# Supplementary material for: Biofilm production by Haemophilus influenzae and Streptococcus pneumoniae isolated from the nasopharynx of children with acute otitis media
Source: BMC Infect Dis. 2019 Jan 11;19:44. doi: 10.1186/s12879-018-3657-9 (PMC6329076; doi:10.1186/s12879-018-3657-9)
Supplement: Supplementary file 2 — Supplementary Data S2: Different cut-offs used to determine the biofilm production by H. influenzae: the different cut-offs used were as followed where AB represented the stained wells containing attached bacteria, CW the stained control wells containing bacteria-free medium only and G the bacterial growth control i) AB – CW: strong production > 0.30, moderate production 0.10–0.30, negative < 0.10 ii) AB / CW: strong production > 6, moderate production 2–6, negative < 2 iii)[(AB – CW) / G]: strong production > 1.10, moderate production 0.35–1.10, negative < 0.35. Strains were classified according to agreement of at least 2 of the 3 methods used to calculate biofilm production. (XLSX 76 kb) [file 12879_2018_3657_MOESM2_ESM.xlsx]

## Sheet: Feuil1
	numéro activ	(DO croissance moyenne - Do blanc Bhi)	(DO croissance moyenne - Do blanc Bhi)*100	DO brute cristal violet	DO Blanc Bhi	DO cristal violet moyenne - Do blanc Bhi	DO cristal violet / DO blanc Bhi	(DO cristal violet moyenne - DO blanc Bhi)/(DO croissance 595 - DO blanc Bhi)	A faire	Méthode 1 BFI = DO CV - DO Bhi	Méthode 2 BFI = DO CV / DO Bhi	Méthode 3 BFI = (DO CV-DO Bhi)/DO croissance 595
1	80794	0.0555	5.55	0.2766	0.1376	0.139	2.01017	2.5045		moyen	moyen	fort
2	80376	0.0135	1.35	0.4655	0.1376	0.3279	3.38299	24.2889	Refait idem	fort	moyen	fort
3	80324	0.137767	13.7767	0.2647	0.1376	0.1271	1.92369	0.922574		moyen	faible	moyen
4	81313	0.1952	19.52	0.362233	0.1376	0.224633	2.63251	1.15079		moyen	moyen	fort
5	81125	0.0785	7.85	0.4991	0.1376	0.3615	3.62718	4.6051		fort	moyen	fort
6	80147	0.0663	6.63	0.439033	0.1376	0.301433	3.19065	4.54651		fort	moyen	fort
7	80676	0.1204	12.04	0.6083	0.1552	0.4531	3.91946	3.76329		fort	moyen	fort
8	80785	0.14	14	0.4004	0.1376	0.2628	2.90988	1.87714		moyen	moyen	fort
9	80101	0.0625	6.25	0.7718	0.1509	0.6209	5.11465	9.9344	Refait	fort	moyen	fort
10	80176	0.0872	8.72	0.3665	0.1376	0.2289	2.66352	2.625		moyen	moyen	fort
11	80868	0.059	5.9	0.3191	0.1376	0.1815	2.31904	3.07627		moyen	moyen	fort
12	81314	0.06	6	1.3002	0.1376	1.1626	9.44913	19.3767	Refait	fort	fort	fort
13	80934	0.0846	8.46	0.9704	0.1509	0.8195	6.43075	9.68676	Refait	fort	fort	fort
14	80504	0.0872	8.72	0.3171	0.1376	0.1795	2.30451	2.05849		moyen	moyen	fort
15	80407	0.0793	7.93	0.9745	0.1376	0.8369	7.08212	10.5536	Vérifier numéro	fort	fort	fort
16	81365	0.181667	18.1667	0.247867	0.1376	0.110267	1.80136	0.606972	Vérif numéro	moyen	faible	moyen
17	81443	0.1092	10.92	0.369967	0.1376	0.232367	2.68871	2.1279		moyen	moyen	fort
18	80136	0.0778	7.78	0.5067	0.1331	0.3736	3.80691	4.80206		fort	moyen	fort
19	80964	0.0691	6.91	0.3669	0.1376	0.2293	2.66642	3.31838		moyen	moyen	fort
20	80594	0.0415	4.15	0.4238	0.1159	0.3079	3.6566	7.41928		fort	moyen	fort
21	81127	0.1353	13.53	0.2903	0.1376	0.1527	2.10974	1.1286		moyen	moyen	fort
22	80508	0.0442	4.42	0.7483	0.1376	0.6107	5.43823	13.8167		fort	moyen	fort
23	80132	0.2351	23.51	0.2442	0.1376	0.1066	1.77471	0.453424	Refait	moyen	faible	moyen
24	81147	0.0405	4.05	3.4554	0.1509	3.3045	22.8986	81.5926	Refaire	fort	fort	fort
25	80081	0.115733	11.5733	0.319733	0.1287	0.191033	2.48433	1.65063		moyen	moyen	fort
26	80216	0.105267	10.5267	0.3917	0.1287	0.263	3.04351	2.49842		moyen	moyen	fort
27	80926	0.173367	17.3367	0.4181	0.1287	0.2894	3.24864	1.66929		moyen	moyen	fort
28	81492	0.0943333	9.43333	0.261867	0.1287	0.133167	2.03471	1.41166		moyen	moyen	fort
29	80383	0.158233	15.8233	0.228867	0.1287	0.100167	1.7783	0.633031		moyen	faible	moyen
30	80755	0.1536	15.36	0.367933	0.1287	0.239233	2.85884	1.55751		moyen	moyen	fort
31	80495	0.0887333	8.87333	0.4515	0.1287	0.3228	3.50816	3.63787		fort	moyen	fort
32	80202	0.0731667	7.31667	0.368233	0.1287	0.239533	2.86118	3.2738		moyen	moyen	fort
33	80327	0.0654	6.54	2.1998	0.1552	2.0446	14.174	31.263		fort	fort	fort
34	80138	0.0464	4.64	1.0621	0.1584	0.9037	6.70518	19.4763	Refait	fort	fort	fort
35	81099	0.104067	10.4067	0.3996	0.1287	0.2709	3.1049	2.60314		moyen	moyen	fort
36	80143	0.122333	12.2333	0.583	0.1287	0.4543	4.52991	3.71362		fort	moyen	fort
37	80994	0.1164	11.64	0.245067	0.1287	0.116367	1.90417	0.999714		moyen	faible	moyen
38	80969	0.1206	12.06	0.2786	0.1287	0.1499	2.16472	1.24295		moyen	moyen	fort
39	81148	0.153367	15.3367	0.3499	0.1287	0.2212	2.71873	1.4423		moyen	moyen	fort
40	80914	0.1268	12.68	1.083	0.1252	0.9578	8.65016	7.55363		fort	fort	fort
41	80477	0.193433	19.3433	0.273267	0.1287	0.144567	2.12328	0.747372		moyen	moyen	moyen
42	80325	0.146133	14.6133	0.296267	0.1287	0.167567	2.30199	1.14667		moyen	moyen	fort
43	80932	0.0772	7.72	0.371267	0.1287	0.242567	2.88474	3.14206		moyen	moyen	fort
44	80038	0.157767	15.7767	0.376033	0.1287	0.247333	2.92178	1.56772		moyen	moyen	fort
45	80898	0.056	5.6	0.8049	0.1287	0.6762	6.25408	12.075		fort	fort	fort
46	81221	0.1221	12.21	0.325133	0.1287	0.196433	2.52629	1.60879		moyen	moyen	fort
47	80082	0.152967	15.2967	0.263633	0.1287	0.134933	2.04843	0.882109		moyen	moyen	moyen
48	80866	0.1908	19.08	0.266067	0.1287	0.137367	2.06734	0.719951		moyen	moyen	moyen
49	80957	0.0779	7.79	0.6518	0.1252	0.5266	5.20607	6.75995		fort	moyen	fort
50	80417	0.1803	18.03	0.2491	0.1287	0.1204	1.93551	0.667776		moyen	faible	moyen
51	80993	0.0644	6.44	0.3947	0.1287	0.266	3.06682	4.13043		moyen	moyen	fort
52	80084	0.0671	6.71	0.3327	0.129	0.2037	2.57907	3.03577		moyen	moyen	fort
53	80875	0.111367	11.1367	0.2975	0.129	0.1685	2.3062	1.51302		moyen	moyen	fort
54	80945	0.1193	11.93	0.443967	0.129	0.314967	3.4416	2.64012		fort	moyen	fort
55	80661	0.2116	21.16	0.230667	0.129	0.101667	1.78811	0.480466	Refait	moyen	faible	moyen
56	80936	0.159867	15.9867	0.199467	0.129	0.0704667	1.54625	0.440784	Refait	faible	faible	moyen
57	80880	0.1478	14.78	0.5109	0.1584	0.3525	3.22538	2.38498	Refait	fort	moyen	fort	A exclure ?
58	80790	0.1246	12.46	0.375	0.129	0.246	2.90698	1.97432		moyen	moyen	fort
59	80198	0.1078	10.78	0.2491	0.129	0.1201	1.93101	1.1141		moyen	faible	fort
60	80913	0.121433	12.1433	0.283533	0.129	0.154533	2.19793	1.27258		moyen	moyen	fort
61	80102	0.103	10.3	0.3009	0.129	0.1719	2.33256	1.66893		moyen	moyen	fort
62	81104	0.154133	15.4133	0.276867	0.129	0.147867	2.14625	0.959343		moyen	moyen	moyen
63	80266	0.173833	17.3833	0.406067	0.129	0.277067	3.1478	1.59386		moyen	moyen	fort
64	80779	0.0876	8.76	0.7447	0.1552	0.5895	4.79832	6.72945		fort	moyen	fort
65	131853	0.1529	15.29	0.266	0.129	0.137	2.06202	0.89601		moyen	moyen	moyen
66	131791	0.1859	18.59	0.4235	0.1552	0.2683	2.72874	1.44325		moyen	moyen	fort
67	131698	0.2598	25.98	0.193867	0.129	0.0648667	1.50284	0.249679	Refait	faible	faible	faible
68	131594	0.236733	23.6733	0.373133	0.129	0.244133	2.89251	1.03126		moyen	moyen	moyen
69	130426	0.2338	23.38	0.3823	0.129	0.2533	2.96357	1.0834		moyen	moyen	moyen
70	132053	0.235467	23.5467	0.2794	0.129	0.1504	2.16589	0.638732		moyen	moyen	moyen
71	131984	0.144967	14.4967	0.235967	0.129	0.106967	1.8292	0.737871	Refait	moyen	faible	moyen
72	132109	0.207933	20.7933	0.235133	0.129	0.106133	1.82274	0.51042	Refait	moyen	faible	moyen
73	131826	0.110433	11.0433	0.2927	0.129	0.1637	2.26899	1.48234		moyen	moyen	fort
74	130380	0.1356	13.56	0.3067	0.129	0.1777	2.37752	1.31047		moyen	moyen	fort
75	131694	0.1692	16.92	0.6608	0.1252	0.5356	5.27796	3.16548		fort	moyen	fort
76	131786	0.1713	17.13	0.2393	0.129	0.1103	1.85504	0.6439	Refait	moyen	faible	moyen
77	131899	0.176	17.6	0.3313	0.129	0.2023	2.56822	1.14943		moyen	moyen	fort
78	132128	0.1472	14.72	0.439	0.129	0.31	3.4031	2.10598		fort	moyen	fort
79	131889	0.0852	8.52	0.4794	0.1444	0.335	3.31994	3.93192		fort	moyen	fort
80	131902	0.1491	14.91	0.2776	0.1444	0.1332	1.92244	0.89336		moyen	faible	moyen
81	130349	0.1181	11.81	0.5569	0.1444	0.4125	3.85665	3.4928		fort	moyen	fort
82	131932	0.1986	19.86	0.3179	0.1444	0.1735	2.20152	0.873615		moyen	moyen	moyen
83	131579	0.0753	7.53	0.4943	0.1252	0.3691	3.94808	4.90173		fort	moyen	fort
84	131869	0.0539	5.39	0.2777	0.1444	0.1333	1.92313	2.4731		moyen	faible	fort
85	131565	0.175	17.5	0.2939	0.1444	0.1495	2.03532	0.854286		moyen	moyen	moyen
86	130368	0.1414	14.14	0.3421	0.1444	0.1977	2.36911	1.39816		moyen	moyen	fort
87	131949	0.0985	9.85	0.4799	0.1252	0.3547	3.83307	3.60102		fort	moyen	fort
88	131848	0.0683	6.83	0.3796	0.1444	0.2352	2.62881	3.44363		moyen	moyen	fort
89	130932	0.1454	14.54	0.3112	0.1444	0.1668	2.15512	1.14718		moyen	moyen	fort
90	132016	0.1066	10.66	0.5407	0.1444	0.3963	3.74446	3.71764		fort	moyen	fort
91	132007	0.1209	12.09	0.2875	0.1444	0.1431	1.991	1.18362		moyen	faible	fort
92	131862	0.1368	13.68	6	0.1252	5.8748	47.9233	42.9444		fort	fort	fort
93	132170	0.1135	11.35	0.2288	0.1444	0.0844	1.58449	0.743612		faible	faible	moyen
94	132052	0.1336	13.36	0.2735	0.1444	0.1291	1.89404	0.966317		moyen	faible	moyen
95	131044	0.1037	10.37	0.2985	0.1444	0.1541	2.06717	1.48602		moyen	moyen	fort
96	131516	0.1685	16.85	0.273	0.1444	0.1286	1.89058	0.763205		moyen	faible	moyen
97	131951	0.1013	10.13	0.5321	0.1444	0.3877	3.6849	3.82725		fort	moyen	fort
98	132110	0.0911	9.11	0.4716	0.1444	0.3272	3.26593	3.59166		fort	moyen	fort
99	132056	0.1707	17.07	0.2749	0.1444	0.1305	1.90374	0.764499		moyen	faible	moyen
100	130712	0.1294	12.94	0.2294	0.1444	0.085	1.58864	0.656878		faible	faible	moyen
101	131803	0.1503	15.03	0.3121	0.1444	0.1677	2.16136	1.11577		moyen	moyen	fort
102	131861	0.0591	5.91	0.4011	0.1509	0.2502	2.65805	4.2335	Refait	moyen	moyen	fort
103	131569	0.047	4.7	0.2702	0.1444	0.1258	1.87119	2.6766		moyen	faible	fort
104	131961	0.0558	5.58	1.3285	0.1509	1.1776	8.80384	21.1039	Refait	fort	fort	fort
105	131705	0.1514	15.14	0.5209	0.1444	0.3765	3.60734	2.48679		fort	moyen	fort
106	131639	0.0947	9.47	0.638	0.1376	0.5004	4.63663	5.28405		fort	moyen	fort
107	131890	0.0382	3.82	0.5003	0.1444	0.3559	3.46468	9.31675		fort	moyen	fort
108	130376	0.0551	5.51	0.6623	0.1159	0.5464	5.71441	9.91652		fort	moyen	fort
109	130515	0.1471	14.71	0.4467	0.1552	0.2915	2.87822	1.98165	Refait	moyen	moyen	fort
110	131707	0.1308	13.08	0.856	0.1509	0.7051	5.67263	5.39067	Refait	fort	moyen	fort
111	131939	0.0775	7.75	0.5148	0.1159	0.3989	4.44176	5.1471		fort	moyen	fort
112	131935	0.0938	9.38	0.9694	0.1159	0.8535	8.36411	9.09915		fort	fort	fort
113	130863	0.1801	18.01	0.3137	0.1159	0.1978	2.70664	1.09828		moyen	moyen	moyen
114	131683	0.1775	17.75	0.399	0.1159	0.2831	3.44262	1.59493		moyen	moyen	fort
115	131798	0.0831	8.31	0.8479	0.1159	0.732	7.31579	8.80866		fort	fort	fort
116	131881	0.1016	10.16	0.743	0.1552	0.5878	4.78737	5.78543	Refait	fort	moyen	fort
117	132005	0.0771	7.71	0.4656	0.1159	0.3497	4.01726	4.53567		fort	moyen	fort
118	131754	0.0773	7.73	0.5681	0.1159	0.4522	4.90164	5.84994		fort	moyen	fort
119	131804	0.0888	8.88	0.6963	0.1159	0.5804	6.00777	6.53604		fort	fort	fort
120	131518	0.0573	5.73	0.7059	0.1159	0.59	6.0906	10.2967		fort	fort	fort
121	132122	0.0848	8.48	0.5299	0.1159	0.414	4.57204	4.88208		fort	moyen	fort
122	131802	0.0405	4.05	0.4165	0.1159	0.3006	3.59362	7.42222		fort	moyen	fort
123	131508	0.168	16.8	0.5822	0.1159	0.4663	5.0233	2.7756		fort	moyen	fort
124	130603	0.0992	9.92	0.5397	0.1552	0.3845	3.47745	3.87601		fort	moyen	fort
125	130398	0.0636	6.36	0.3672	0.1159	0.2513	3.16825	3.95126		moyen	moyen	fort
126	130333	0.0798	7.98	0.4405	0.1159	0.3246	3.80069	4.06767	Vérifier numéro	fort	moyen	fort
127	131814	0.1258	12.58	0.2859	0.1159	0.17	2.46678	1.35135		moyen	moyen	fort
128	131996	0.1542	15.42	0.4594	0.1159	0.3435	3.96376	2.22763		fort	moyen	fort	A exclure ?
129	561	0.0823	8.23	0.3251	0.1159	0.2092	2.805	2.54192		moyen	moyen	fort
130	127	0.1887	18.87	0.3961	0.1159	0.2802	3.4176	1.4849		moyen	moyen	fort
131	200	0.1738	17.38	0.2233	0.1159	0.1074	1.92666	0.617952	Refait	moyen	faible	moyen
132	238	0.1366	13.66	0.5087	0.1159	0.3928	4.38913	2.87555		fort	moyen	fort
133	273	0.0736	7.36	0.212	0.1252	0.0868	1.69329	1.17935	Refait	faible	faible	fort
134	674	0.0626	6.26	0.4129	0.1552	0.2577	2.66044	4.11661	Refait	moyen	moyen	fort
135	620	0.0792	7.92	0.6216	0.1252	0.4964	4.96486	6.26768		fort	moyen	fort
136	595	0.0994	9.94	0.427	0.1552	0.2718	2.75129	2.73441		moyen	moyen	fort
137	563	0.0973	9.73	1.0874	0.1552	0.9322	7.00644	9.58068		fort	fort	fort
138	501	0.0954	9.54	0.532	0.1326	0.3994	4.01207	4.18658		fort	moyen	fort
139	186	0.184633	18.4633	0.2953	0.1326	0.1627	2.227	0.881206		moyen	moyen	moyen
140	261	0.139433	13.9433	0.3109	0.1326	0.1783	2.34465	1.27875	Refait	moyen	moyen	fort
141	278	0.0848667	8.48667	0.283867	0.1326	0.151267	2.14077	1.7824	Refait	moyen	moyen	fort
142	692	0.112567	11.2567	0.282733	0.1326	0.150133	2.13223	1.33373	Refait	moyen	moyen	fort
143	622	0.162933	16.2933	0.3564	0.1326	0.2238	2.68778	1.37357		moyen	moyen	fort
144	600	0.133333	13.3333	0.300467	0.1326	0.167867	2.26596	1.259		moyen	moyen	fort
145	567	0.0549	5.49	0.296067	0.1326	0.163467	2.23278	2.97753		moyen	moyen	fort
146	507	0.0697333	6.97333	0.382933	0.1326	0.250333	2.88788	3.58987		moyen	moyen	fort
147	167	0.120967	12.0967	0.5665	0.1326	0.4339	4.27225	3.58694		fort	moyen	fort
148	221	0.107233	10.7233	0.507033	0.1326	0.374433	3.82378	3.49176		fort	moyen	fort
149	283	0.1141	11.41	0.3323	0.1326	0.1997	2.50603	1.75022		moyen	moyen	fort
150	718	0.189	18.9	0.4832	0.1552	0.328	3.1134	1.73545		fort	moyen	fort
151	623	0.0808	8.08	0.9737	0.1552	0.8185	6.27384	10.13		fort	fort	fort
152	603	0.134767	13.4767	0.4592	0.1326	0.3266	3.46305	2.42345		fort	moyen	fort
153	572	0.0562	5.62	1.6771	0.1509	1.5262	11.114	27.1566	Refait	fort	fort	fort
154	508	0.214233	21.4233	0.7351	0.1326	0.6025	5.54374	2.81235		fort	moyen	fort
155	177	0.2694	26.94	0.340567	0.1326	0.207967	2.56838	0.771962		moyen	moyen	moyen
156	222	0.103633	10.3633	0.6211	0.1326	0.4885	4.68401	4.71373		fort	moyen	fort
157	288	0.1443	14.43	0.4352	0.1584	0.2768	2.74747	1.91823	Refait	moyen	moyen	fort
158	737	0.0411	4.11	0.3975	0.1252	0.2723	3.17492	6.6253		moyen	moyen	fort
159	631	0.0584	5.84	0.4036	0.1252	0.2784	3.22364	4.76712		moyen	moyen	fort
160	605	0.1149	11.49	0.6028	0.1552	0.4476	3.88402	3.89556	Refait	fort	moyen	fort
161	574	0.1246	12.46	0.395	0.1326	0.2624	2.97888	2.10594		moyen	moyen	fort
162	523	0.1203	12.03	0.4112	0.1326	0.2786	3.10106	2.31588		moyen	moyen	fort
163	179	0.0608667	6.08667	0.294	0.1278	0.1662	2.30047	2.73056		moyen	moyen	fort
164	228	0.0542667	5.42667	0.357167	0.1278	0.229367	2.79473	4.22666		moyen	moyen	fort
165	289	0.0721	7.21	0.366233	0.1278	0.238433	2.86568	3.30698		moyen	moyen	fort
166	786	0.0982667	9.82667	0.1985	0.1278	0.0707	1.55321	0.719471	Refait	faible	faible	moyen
167	635	0.0555	5.55	0.4477	0.1552	0.2925	2.88466	5.27027		moyen	moyen	fort
168	610	0.0821	8.21	0.4401	0.1278	0.3123	3.44366	3.8039		fort	moyen	fort
169	584	0.071	7.1	0.3467	0.1278	0.2189	2.71283	3.0831		moyen	moyen	fort
170	529	0.072	7.2	0.5251	0.1552	0.3699	3.38338	5.1375		fort	moyen	fort
171	152	0.0941	9.41	0.3894	0.1252	0.2642	3.11022	2.80765		moyen	moyen	fort
172	229	0.0631	6.31	0.4264	0.1278	0.2986	3.33646	4.73217		moyen	moyen	fort
173	297	0.1032	10.32	0.9454	0.1339	0.8115	7.06049	7.86337		fort	fort	fort
174	787	0.1175	11.75	0.2947	0.1252	0.1695	2.35383	1.44255	Refait	moyen	moyen	fort
175	638	0.178	17.8	0.359767	0.1278	0.231967	2.81508	1.30318		moyen	moyen	fort
176	611	0.081	8.1	0.3996	0.1278	0.2718	3.12676	3.35556		moyen	moyen	fort
177	587	0.1524	15.24	0.176533	0.1278	0.0487333	1.38132	0.319773	Refait	faible	faible	faible
178	534	0.1661	16.61	0.3395	0.1278	0.2117	2.65649	1.27453		moyen	moyen	fort
179	144	0.1878	18.78	0.270267	0.1278	0.142467	2.11476	0.758608		moyen	moyen	moyen
180	203	0.0631	6.31	0.4811	0.1278	0.3533	3.76448	5.59905		fort	moyen	fort
181	308	0.0534	5.34	0.493667	0.1278	0.365867	3.86281	6.85144		fort	moyen	fort
182	793	0.0762	7.62	0.6423	0.1252	0.5171	5.13019	6.78609		fort	moyen	fort
183	639	0.0536	5.36	0.3057	0.1278	0.1779	2.39202	3.31903		moyen	moyen	fort
184	617	0.1373	13.73	0.5791	0.1278	0.4513	4.5313	3.28696		fort	moyen	fort
185	590	0.0636	6.36	0.3986	0.1278	0.2708	3.11894	4.25786		moyen	moyen	fort
186	549	0.1786	17.86	0.4502	0.1278	0.3224	3.52269	1.80515		fort	moyen	fort
187	145	0.1035	10.35	0.8687	0.1339	0.7348	6.48768	7.09952		fort	fort	fort
188	218	0.1155	11.55	1.0455	0.1339	0.9116	7.80807	7.89264		fort	fort	fort
189	864	0.0581	5.81	0.2501	0.1376	0.1125	1.81759	1.93632	Refait	moyen	faible	fort
190	828	0.0389	3.89	0.2573	0.1376	0.1197	1.86991	3.07712	Refait	moyen	faible	fort
191	640	0.0931	9.31	0.5084	0.1376	0.3708	3.69477	3.98281		fort	moyen	fort
192	618	0.0719	7.19	0.2847	0.1376	0.1471	2.06904	2.0459		moyen	moyen	fort
moyenne		0.114794	11.4794	0.503752	0.133708	0.370044	3.75675	4.46548
									Capacité production biofilm :	methode 1	méthode 2	méthode 3
									fort	> 0,3	> 6	> 1,1
									moyenne	0,1 - 0,299	2 à 6	0,35 - 1,09
									faible	< 0,1	< 2	< 0,35

## Sheet: Feuil2
Capacité production biofilm :	Méthode 1	Méthode 2	Méthode 3	Méthode 4	Méthode 5	Méthode 6
Méthode de calcul	DO CV - DO Bhi	DO CV / DO Bhi	(DO CV-DO Bhi)/DO croissance 595	% pneumo 18	DO CV - DO Bhi	% pneumo 18 / (Do croissance - Do blanc)
fort	> 0,3	> 6	> 1,1	> 95 %	> 0,3	> 1200
moyenne	0,1 - 0,299	2 à 6	0,35 - 1,09	58 à 95 %	0,175 - 0,299	500 - 1200
faible	< 0,1	< 2	< 0,35	< 58 %	< 0,175	< 500
Nombre fort	76	20	157	64	76	57
% fort	39.5833	10.4167	81.7708	33.3333	39.5833	29.6875
Nombre moyen	109	144	33	66	58	70
% moyen	56.7708	75	17.1875	34.375	30.2083	36.4583
Nombre faible	7	28	2	62	58	65
% faible	3.64583	14.5833	1.04167	32.2917	30.2083	33.8542
total	100	100	100	100	100	100
Nombre total pneumo	192
